# Supplementary material
Source: publisher site journal article supplement (https://www.dovepress.com/get_supplementary_file.php?f=475531.docx)
Supplement: Supplementary file 1 [file get_supplementary_file.php]

**Hepatoma-Targeting and ROS-Responsive Polymeric Micelle-Based Chemotherapy Combined with Photodynamic Therapy for Hepatoma Treatment**

Xueya Xu*, Weili Lu*, Hua Zhang, Xiaoying Wang, Caixia Huang, Qiuping Huang, Wen Xu, Wei Xu

Pharmacy College, Fujian University of Traditional Chinese Medicine, Fuzhou, 350122, People’s Republic of China

*These authors contributed equally to this work.

Correspondence: Xiaoying Wang; Wei Xu, Pharmacy College, Fujian University of Traditional Chinese Medicine, 1 Qiuyang Road, Fuzhou, 350122, People’s Republic of China, E-mail 2003032@fjtcm.edu.cn; 2000017@fjtcm.edu.cn

**Supplementary data**

**Materials and Methods**

Preparation of Cela/Ce6/GCTR PMs

**Table S1** The effects of different Cela and Ce6 feed ratios on Cela/Ce6/GCTR PMs（mean ± SD，n=3）

| Cela and Ce6 feed ratios | Particle size  （nm） | PDI | Zeta  （mV） | DLCela  （%） | EECela  （%） | DLCe6  （%） | EECe6  （%） |
| --- | --- | --- | --- | --- | --- | --- | --- |
| 0:0 | 182.53±2.80 | 0.10±0.01 | -13.03±0.33 | — | — | — | — |
| 1:0 | 172.73±2.37 | 0.06±0.02 | -19.56±0.73 | 44.74±3.05 | 85.16±6.56 | — | — |
| 1:0.2 | 172.20±13.09 | 0.13±0.01 | -21.20±1.57 | 38.47±2.47 | 82.29±4.64 | 4.02±0.19 | 43.14±2.28 |
| 1:0.4 | 196.27±8.22 | 0.12±0.04 | -22.34±1.27 | 39.56±3.00 | 89.76±4.63 | 12.09±0.69 | 68.64±0.26 |
| 1:0.6 | 174.93±6.97 | 0.13±0.02 | -22.95±0.91 | 37.15±0.52 | 93.26±3.57 | 16.79±0.10 | 70.30±1.68 |
| 1:0.8 | 193.93±4.51 | 0.14±0.01 | -22.24±1.44 | 35.28±2.16 | 94.93±6.80 | 24.00±1.58 | 80.70±6.49 |
| 1:1 | 163.63±4.46 | 0.15±0.01 | -23.63±0.25 | 34.33±3.51 | 95.93±8.21 | 26.43±2.29 | 73.94±5.21 |

HPLC detection method

An Inertsil ODS-SP C18 column (4.6 × 250 mm, 5 µm) was used. The mobile phase was acetonitrile: water with 5% phosphoric acid (87:13 for Cela; 75:25 for Ce6, v/v). Flow rate: 1.0 mL/min. The column temperature was 30 ºC. The detection wavelength was 425 nm for Cela and 401 nm for Ce6.

UPLC-MS/MS method

Quantitative detection of Cela and Ce6 in plasma and tissue samples was performed using a UPLC BEH C-18 column (2.1 mm × 100 mm, 1.7 µm, Waters). The mobile phase was methanol (A): water with 0.1% formic acid (B)=95:5 (v/v). The flow rate was 0.25 mL/min. The column temperature was 30 °C. Injection volume: 2 µL. The mass spectrometer was operated in the positive ion electrospray ionization mode. The mass spectrum conditions: ion source: Electrospray ionization (ESI) source; scanning mode, multiple response monitoring (MRM); capillary voltage, 2.0 kV; solvent airflow (nitrogen) flow rate, 800 L/h; ion source temperature: 150 °C; solvent removal temperature, 500 °C; cone hole flow rate (nitrogen): 150 L/h; extractor, 3.00 V; air curtain flow, argon; cone-hole voltage of Cela, Ce6, and tanshinone IIA, 22 V, 25 V, and 47 V, respectively; collision energies of Cela, Ce6, and tanshinone IIA, 30 eV, 25 eV, and 25 eV, respectively. The ion reactions used for quantitative analysis: Cela, m/z 451.6→201.1; Ce6, m/z 597.07→465.21; Tanshinone IIA, m/z 269.7→226.1.

**Results**

In vitro drug release

**Table S2** Cela in vitro release kinetic model.

| Groups | zero-order kinetics | | first-order kinetics | | Higuchi | |
| --- | --- | --- | --- | --- | --- | --- |
| Equation | R2 | Equation | R2 | Equation | R2 |
| Cela in pH 7.4 | Qt=0.979t+36.482 | 0.667 0 | Qt=85.728(1-e-0.264t) | 0.995 5 | Qt=10.209t1/2+20.316 | 0.831 9 |
| Cela in pH 5.0+0.1mmol/L H2O2 | Qt=0.986t+38.679 | 0.672 1 | Qt=87.664(1-e-0.282t) | 0.996 0 | Qt=10.239t1/2+22.550 | 0.833 7 |
| Cela/GCTR PMs in pH 7.4 | Qt=0.621t+4.455 | 0.959 8 | Qt=45.145(1-e-0.037t) | 0.998 2 | Qt=5.507t1/2+2.442 | 0.990 9 |
| Cela/GCTR PMs in pH 5.0+0.1mmol/L H2O2 | Qt=0.812t+16.468 | 0.939 2 | Qt=59.133(1-e-0.090t) | 0.936 7 | Qt=7.346t1/2+6.933 | 0.992 1 |
| Cela/Ce6/GCTR PMs in pH 7.4 | Qt=0.470t+2.029 | 0.992 3 | Qt=46.005(1-e-0.017t) | 0.997 7 | Qt=4.027t1/2-2.714 | 0.988 0 |
| Cela/Ce6/GCTR PMs in pH 7.4+NIR | Qt=0.838t+6.118 | 0.964 8 | Qt=61.205(1-e-0.036t) | 0.997 3 | Qt=7.415t1/2-3.141 | 0.994 1 |
| Cela/Ce6/GCTR PMs in pH 5.0 +0.1mmol/L H2O2+NIR | Qt=1.056t+24.554 | 0.912 6 | Qt=79.437(1-e-0.104t) | 0.934 8 | Qt=9.721t1/2+11.586 | 0.982 0 |

**Table S3** Ce6 in vitro release kinetic model.

| Groups | zero-order kinetics | | first-order kinetics | | | Higuchi | |
| --- | --- | --- | --- | --- | --- | --- | --- |
| Equation | R2 | Equation | R2 | Equation | | R2 |
| Cela/Ce6/GCTR PMs in pH 7.4 | Qt=0.163t+4.636 | 0.765 6 | Qt=12.641(1-e-0.203t) | 0.986 7 | Qt=1.609t1/2+2.254 | | 0.894 4 |
| Cela/Ce6/GCTR PMs in pH 7.4+NIR | Qt=0.443t+18.402 | 0.831 0 | Qt=37.154(1-e-0.360t) | 0.853 6 | Qt=4.238t1/2-12.432 | | 0.933 3 |
| Cela/Ce6/GCTR PMs in pH 5.0 +0.1mmol/L H2O2+NIR | Qt=0.390t+20.935 | 0.783 8 | Qt=34.956(1-e-1.134t) | 0.854 6 | Qt=3.783t1/2+15.478 | | 0.896 0 |

Figure S1 Organ sections of tumor-bearing mice by H&E straining (×400)
